# Supplementary material for: Modeling ionization quenching in organic scintillators
Source: Royal Society of Chemistry journal article supplement (doi:10.1039/d2ma00388k), 2022-01-01
Supplement: d2ma00388k1.pdf [file d2ma00388k1.pdf]

## Electronic Supplementary Information (ESI)

### Modeling ionization quenching in organic scintillators

T. A. Laplace<sup>1</sup>, B. L. Goldblum<sup>1,2</sup>, J. A. Brown<sup>1</sup>, G. LeBlanc<sup>1</sup>, T. Li<sup>1</sup>, J. J. Manfredi<sup>1</sup>,  
and Erik Brubaker<sup>3</sup>

<sup>1</sup>Department of Nuclear Engineering, University of California, Berkeley, CA 94720 USA.

<sup>2</sup>Nuclear Science Division at Lawrence Berkeley National Laboratory, Berkeley, CA, 94720 USA.

<sup>3</sup>Sandia National Laboratories, Livermore, CA, 94550 USA.

#### 1 Proton light yield model performance

Table S1. Model goodness-of-fit for proton light yield data with no parameter constraints. The values correspond to the median  $\chi^2$  statistic from the Monte Carlo distribution divided by the number of degrees of freedom. The uncertainty is given by the median absolute deviation.

| Scintillator  | Birks             | Chou             | Hong et al.      | Yoshida et al.   | Voltz et al.     |
|---------------|-------------------|------------------|------------------|------------------|------------------|
| EJ-204        | (11234 ± 1510)/31 | (1878 ± 674)/30  | (1851 ± 840)/29  | (1270 ± 694)/28  | (1411 ± 704)/28  |
| EJ-309        | (37064 ± 7857)/46 | (2149 ± 1660)/45 | (2369 ± 1660)/44 | (1863 ± 1562)/43 | (2362 ± 1453)/43 |
| EJ-276        | (1976 ± 525)/21   | (129 ± 42)/20    | (463 ± 145)/19   | (93 ± 25)/18     | (95 ± 18)/18     |
| Organic glass | (6708 ± 1714)/52  | (740 ± 205)/51   | (428 ± 174)/50   | (342 ± 151)/49   | (376 ± 143)/49   |

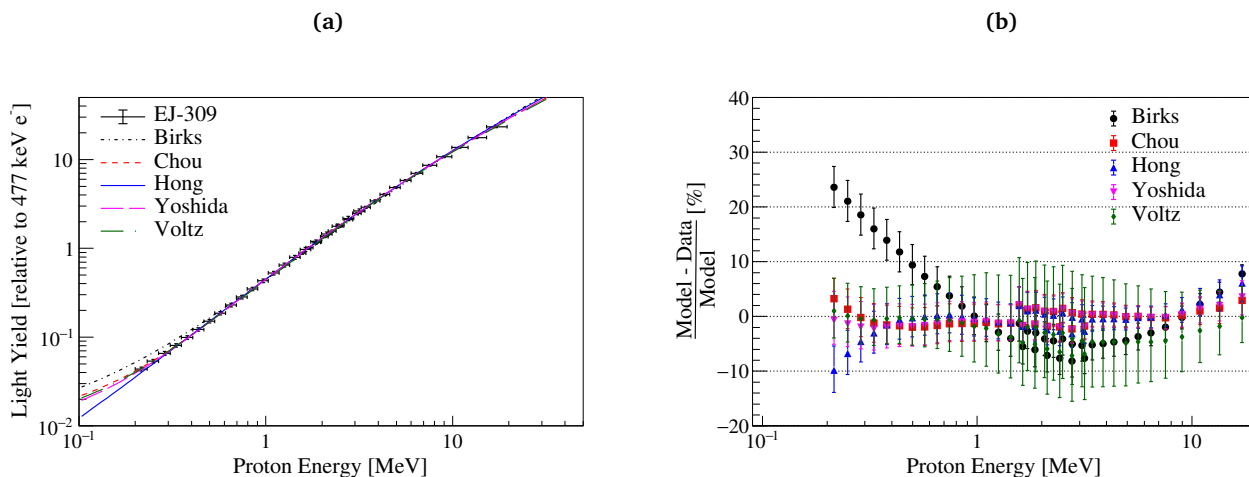

Figure S1. (a) Specific luminescence models applied to EJ-309 proton light yield data. (b) Standard deviation of model fits to the measured data.

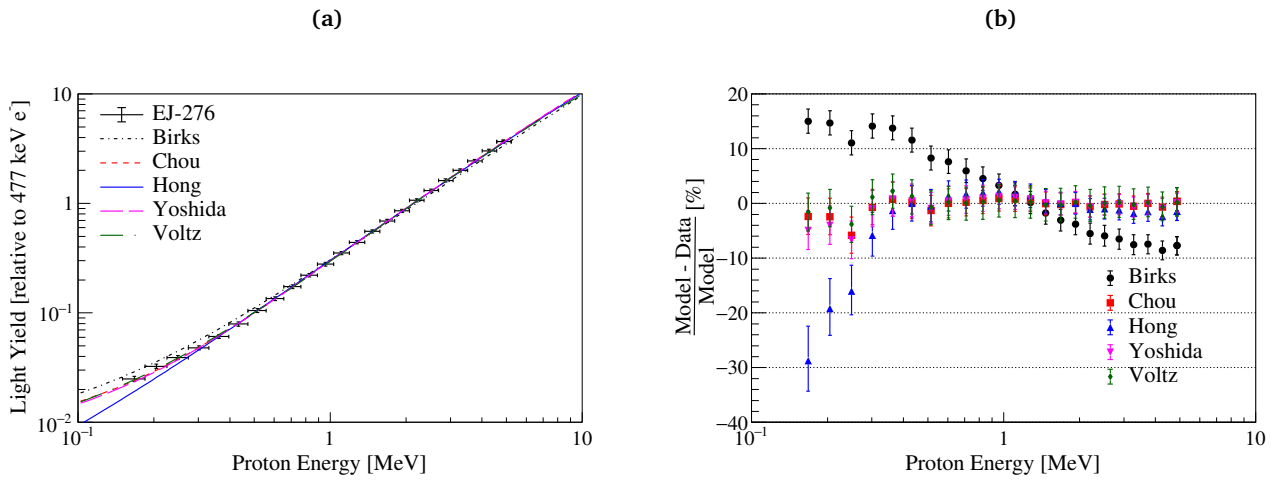

Figure S2. (a) Specific luminescence models applied to EJ-276 proton light yield data. (b) Standard deviation of model fits to the measured data.

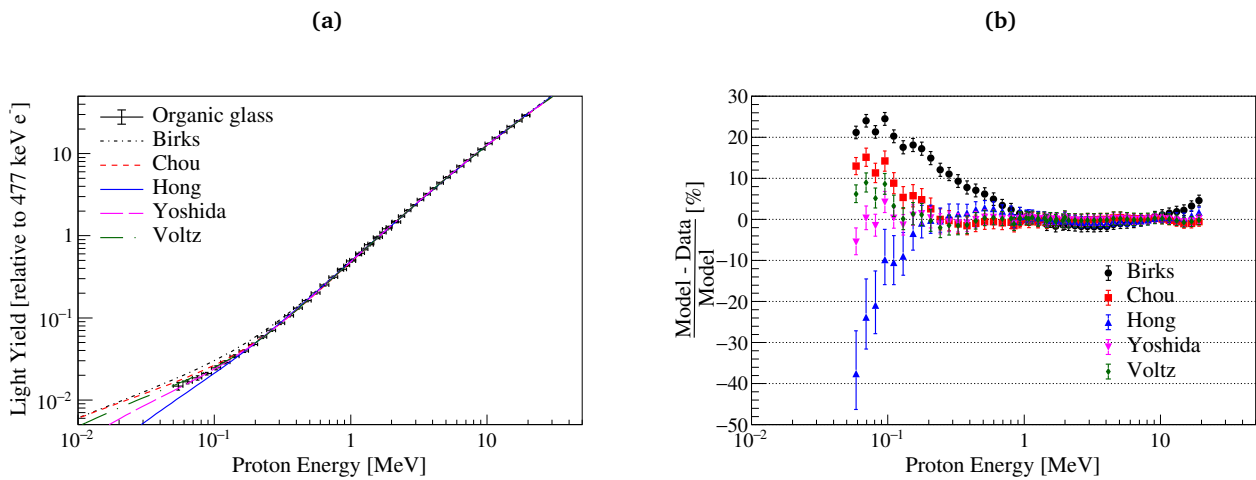

Figure S3. (a) Specific luminescence models applied to the organic glass proton light yield data. (b) Standard deviation of model fits to the measured data.

## 2 EJ-204 proton light yield model parameters and covariance

Table S2. EJ-204 proton light yield model parameters.

| Model          | $S$ or $S_e$<br>(rel. 477 keV $e^-$ ) | $S_n$<br>(rel. 477 keV $e^-$ ) | $kB$ or $kB_e$<br>(mg/cm <sup>2</sup> /MeV) | $kB_n$<br>(mg/cm <sup>2</sup> /MeV) | $C$<br>(mg/cm <sup>2</sup> /MeV) <sup>2</sup> |
|----------------|---------------------------------------|--------------------------------|---------------------------------------------|-------------------------------------|-----------------------------------------------|
| Birks          | 2.51                                  | —                              | 13.1                                        | —                                   | —                                             |
| Chou           | 1.86                                  | —                              | 5.50                                        | —                                   | 7.93                                          |
| Hong et al.    | 2.51                                  | 2.51                           | 9.64                                        | 3163                                | —                                             |
| Yoshida et al. | 2.14                                  | 2.47                           | 7.61                                        | 284                                 | 6.12                                          |

(a) Birks, Chou, Hong et al. and Yoshida et al.

| $S$ (rel. 477 keV $e^-$ ) | $T_0$ (keV) | $B_s$ (mg/cm <sup>2</sup> /MeV) | $R_d$ | $B_t$ (mg/cm <sup>2</sup> /MeV) |
|---------------------------|-------------|---------------------------------|-------|---------------------------------|
| 1.79                      | 7.40        | 7.93                            | 0.409 | 1.74                            |

(b) Voltz et al.

**Table S3. EJ-204 proton light yield model parameter covariance matrices.**

|      | $S$       | $kB$      |
|------|-----------|-----------|
| $S$  | $2.09e-6$ | $3.04e-5$ |
| $kB$ | $3.04e-5$ | $9.00e-2$ |

(a) Birks

|      | $S$        | $kB$   | $C$        |
|------|------------|--------|------------|
| $S$  | $1.62e-2$  | 0.104  | $-1.61e-3$ |
| $kB$ | 0.104      | 0.748  | -0.140     |
| $C$  | $-1.61e-3$ | -0.140 | 0.439      |

(b) Chou

|        | $S_e$      | $S_n$      | $kB_e$     | $kB_n$     |
|--------|------------|------------|------------|------------|
| $S_e$  | $4.08e-5$  | $2.26e-10$ | $2.76e-4$  | $1.51e-2$  |
| $S_n$  | $2.26e-10$ | $1.09e-12$ | $3.68e-10$ | $-2.44e-6$ |
| $kB_e$ | $2.76e-4$  | $3.68e-10$ | 0.349      | -319       |
| $kB_n$ | $1.51e-2$  | $-2.44e-6$ | -319       | 3.86e5     |

(c) Hong et al.

|        | $S_e$      | $S_n$      | $kB_e$    | $kB_n$   | $C$        |
|--------|------------|------------|-----------|----------|------------|
| $S_e$  | $3.14e-2$  | $2.26e-3$  | 0.208     | 13.4     | $-6.98e-2$ |
| $S_n$  | $2.26e-3$  | $3.00e-2$  | $8.24e-3$ | -2.96    | $2.11e-2$  |
| $kB_e$ | 0.208      | $8.24e-3$  | 1.49      | 92.5     | -0.646     |
| $kB_n$ | 13.4       | -2.96      | 92.5      | $3.29e4$ | -133       |
| $C$    | $-6.98e-2$ | $-2.11e-2$ | -0.646    | -133     | 1.09       |

(d) Yoshida et al.

|       | $S$       | $T_0$  | $B_s$     | $R_d$     | $B_t$     |
|-------|-----------|--------|-----------|-----------|-----------|
| $S$   | $1.44e-2$ | 0.315  | $9.53e-2$ | $4.94e-4$ | $1.17e-2$ |
| $T_0$ | 0.315     | 18.8   | -2.47     | -0.186    | -0.293    |
| $B_s$ | $9.53e-2$ | 2.47   | 3.83      | 0.143     | 0.474     |
| $R_d$ | $4.94e-4$ | -0.186 | 0.143     | $8.32e-3$ | $2.52e-2$ |
| $B_t$ | $1.17e-2$ | -0.293 | 0.474     | $2.52e-2$ | $8.68e-2$ |

(e) Voltz et al.

### 3 EJ-309 proton light yield model parameters and covariance

Table S4. EJ-309 proton light yield model parameters.

| Model          | $S$ or $S_e$<br>(rel. 477 keV $e^-$ ) | $S_n$<br>(rel. 477 keV $e^-$ ) | $kB$ or $kB_e$<br>(mg/cm <sup>2</sup> /MeV) | $kB_n$<br>(mg/cm <sup>2</sup> /MeV) | $C$<br>(mg/cm <sup>2</sup> /MeV) <sup>2</sup> |
|----------------|---------------------------------------|--------------------------------|---------------------------------------------|-------------------------------------|-----------------------------------------------|
| Birks          | 2.51                                  | —                              | 10.4                                        | —                                   | —                                             |
| Chou           | 1.94                                  | —                              | 4.55                                        | —                                   | 6.91                                          |
| Hong et al.    | 2.17                                  | 2.50                           | 4.38                                        | 4403                                | —                                             |
| Yoshida et al. | 1.98                                  | 2.42                           | 4.89                                        | 168                                 | 6.13                                          |

(a) Birks, Chou, Hong et al. and Yoshida et al.

| $S$ (rel. 477 keV $e^-$ ) | $T_0$ (keV) | $B_s$ (mg/cm <sup>2</sup> /MeV) | $R_d$ | $B_t$ (mg/cm <sup>2</sup> /MeV) |
|---------------------------|-------------|---------------------------------|-------|---------------------------------|
| 1.86                      | 2.54        | 10.9                            | 0.54  | 1.90                            |

(b) Voltz et al.

Table S5. EJ-309 proton light yield model parameter covariance matrices.

|      | $S$       | $kB$      |
|------|-----------|-----------|
| $S$  | $1.00e-3$ | $5.44e-3$ |
| $kB$ | $5.44e-3$ | 0.279     |

(a) Birks

|      | $S$        | $kB$   | $C$        |
|------|------------|--------|------------|
| $S$  | $2.43e-2$  | 0.165  | $-8.37e-4$ |
| $kB$ | 0.165      | 1.25   | -0.170     |
| $C$  | $-8.37e-4$ | -0.170 | 0.534      |

(b) Chou

|        | $S_e$     | $S_n$     | $kB_e$    | $kB_n$   |
|--------|-----------|-----------|-----------|----------|
| $S_e$  | $3.53e-2$ | $4.28e-3$ | 0.258     | -26.3    |
| $S_n$  | $4.28e-3$ | $1.06e-2$ | $3.55e-2$ | -5.87    |
| $kB_e$ | 0.258     | $3.55e-2$ | 2.35      | -629     |
| $kB_n$ | -26.3     | -5.87     | -629      | $5.39e5$ |

(c) Hong et al.

|        | $S_e$      | $S_n$     | $kB_e$ | $kB_n$   | $C$        |
|--------|------------|-----------|--------|----------|------------|
| $S_e$  | $2.38e-2$  | $1.40e-2$ | 0.163  | -1.74    | $-2.74e-3$ |
| $S_n$  | $1.40e-2$  | $6.86e-2$ | 0.101  | -28.4    | $8.23e-2$  |
| $kB_e$ | 0.163      | 0.101     | 1.25   | -16.2    | -0.162     |
| $kB_n$ | -1.74      | -28.4     | -16.2  | $5.79e4$ | -165       |
| $C$    | $-2.74e-3$ | $8.23e-2$ | -0.162 | -165     | 0.966      |

(d) Yoshida et al.

|       | $S$       | $T_0$     | $B_s$ | $R_d$     | $B_t$     |
|-------|-----------|-----------|-------|-----------|-----------|
| $S$   | $7.98e-3$ | $1.93e-2$ | 0.265 | $3.53e-4$ | $5.82e-3$ |
| $T_0$ | $1.93e-2$ | 26.2      | -4.90 | -0.164    | -0.378    |
| $B_s$ | 0.265     | -4.90     | 22.0  | 0.226     | 0.638     |
| $R_d$ | $3.53e-4$ | -0.164    | 0.226 | $8.76e-3$ | $2.10e-2$ |
| $B_t$ | $5.82e-3$ | -0.378    | 0.638 | $2.10e-2$ | $5.73e-2$ |

(e) Voltz et al.

## 4 EJ-276 proton light yield model parameters and covariance

Table S6. EJ-276 proton light yield model parameters.

| Model          | $S$ or $S_e$<br>(rel. 477 keV $e^-$ ) | $S_n$<br>(rel. 477 keV $e^-$ ) | $kB$ or $kB_e$<br>(mg/cm <sup>2</sup> /MeV) | $kB_n$<br>(mg/cm <sup>2</sup> /MeV) | $C$<br>(mg/cm <sup>2</sup> /MeV) <sup>2</sup> |
|----------------|---------------------------------------|--------------------------------|---------------------------------------------|-------------------------------------|-----------------------------------------------|
| Birks          | 2.51                                  | —                              | 17.5                                        | —                                   | —                                             |
| Chou           | 2.43                                  | —                              | 13.3                                        | —                                   | 9.55                                          |
| Hong et al.    | 2.51                                  | 2.51                           | 12.5                                        | 5286                                | —                                             |
| Yoshida et al. | 2.46                                  | 2.51                           | 13.6                                        | 4.18                                | 8.95                                          |

(a) Birks, Chou, Hong et al. and Yoshida et al.

| $S$ (rel. 477 keV $e^-$ ) | $T_0$ (keV) | $B_s$ (mg/cm <sup>2</sup> /MeV) | $R_d$ | $B_t$ (mg/cm <sup>2</sup> /MeV) |
|---------------------------|-------------|---------------------------------|-------|---------------------------------|
| 1.76                      | 8.15        | 7.67                            | 0.230 | 1.29                            |

(b) Voltz et al.

Table S7. EJ-276 proton light yield model parameter covariance matrices.

|      | $S$       | $kB$      |
|------|-----------|-----------|
| $S$  | $3.19e-5$ | $3.53e-4$ |
| $kB$ | $3.53e-4$ | 0.227     |

(a) Birks

|      | $S$       | $kB$   | $C$       |
|------|-----------|--------|-----------|
| $S$  | $1.90e-2$ | 0.165  | $2.11e-2$ |
| $kB$ | 0.165     | 1.72   | -0.265    |
| $C$  | $2.11e-2$ | -0.265 | 1.97      |

(b) Chou

|        | $S_e$       | $S_n$       | $kB_e$     | $kB_n$    |
|--------|-------------|-------------|------------|-----------|
| $S_e$  | $2.81e-16$  | $-2.21e-13$ | $2.12e-11$ | $3.65e-7$ |
| $S_n$  | $-2.21e-13$ | $2.67e-4$   | $1.31e-3$  | -1.50     |
| $kB_e$ | $2.12e-11$  | $1.31e-3$   | 1.13       | -1283     |
| $kB_n$ | $3.65e-7$   | -1.50       | -1283      | $1.78e6$  |

(c) Hong et al.

|        | $S_e$     | $S_n$      | $kB_e$     | $kB_n$ | $C$       |
|--------|-----------|------------|------------|--------|-----------|
| $S_e$  | $1.25e-2$ | $1.45e-4$  | 0.110      | -0.132 | $9.49e-3$ |
| $S_n$  | $1.45e-4$ | $2.44e-3$  | $-7.57e-5$ | -0.629 | $7.18e-3$ |
| $kB_e$ | 0.110     | $-7.57e-5$ | 1.26       | 1.88   | -0.392    |
| $kB_n$ | -0.32     | -0.629     | 1.88       | 963    | -14.0     |
| $C$    | $9.49e-3$ | $7.18e-3$  | -0.392     | -14.0  | 2.10      |

(d) Yoshida et al.

|       | $S$       | $T_0$     | $B_s$     | $R_d$     | $B_t$     |
|-------|-----------|-----------|-----------|-----------|-----------|
| $S$   | $1.01e-2$ | 0.149     | $6.89e-2$ | $1.08e-3$ | $1.14e-2$ |
| $T_0$ | 0.149     | 6.73      | 0.654     | $1.96e-3$ | 0.112     |
| $B_s$ | $6.89e-2$ | 0.654     | 0.875     | $2.80e-2$ | 0.180     |
| $R_d$ | $1.08e-3$ | $1.96e-3$ | $2.80e-2$ | $1.63e-3$ | $8.84e-3$ |
| $B_t$ | $1.14e-2$ | 0.112     | 0.180     | $8.84e-3$ | $5.32e-2$ |

(e) Voltz et al.



## 5 Organic glass proton light yield model parameters and covariance

Table S8. Organic glass proton light yield model parameters.

| Model          | $S$ or $S_e$<br>(rel. 477 keV e <sup>-</sup> ) | $S_n$<br>(rel. 477 keV e <sup>-</sup> ) | $kB$ or $kB_e$<br>(mg/cm <sup>2</sup> /MeV) | $kB_n$<br>(mg/cm <sup>2</sup> /MeV) | $C$<br>(mg/cm <sup>2</sup> /MeV) <sup>2</sup> |
|----------------|------------------------------------------------|-----------------------------------------|---------------------------------------------|-------------------------------------|-----------------------------------------------|
| Birks          | 2.44                                           | —                                       | 9.83                                        | —                                   | —                                             |
| Chou           | 2.14                                           | —                                       | 6.69                                        | —                                   | 4.24                                          |
| Hong et al.    | 2.29                                           | 2.51                                    | 7.88                                        | 1058                                | —                                             |
| Yoshida et al. | 2.19                                           | 2.43                                    | 7.15                                        | 190                                 | 2.90                                          |

(a) Birks, Chou, Hong et al. and Yoshida et al.

| $S$ (rel. 477 keV e <sup>-</sup> ) | $T_0$ (keV) | $B_s$ (mg/cm <sup>2</sup> /MeV) | $R_d$ | $B_t$ (mg/cm <sup>2</sup> /MeV) |
|------------------------------------|-------------|---------------------------------|-------|---------------------------------|
| 2.05                               | 13.2        | 8.91                            | 0.453 | 1.73                            |

(b) Voltz et al.

**Table S9. Organic glass proton light yield model parameter covariance matrices.**

|      | $S$       | $kB$      |
|------|-----------|-----------|
| $S$  | $2.71e-3$ | $1.28e-2$ |
| $kB$ | $1.28e-2$ | 0.101     |

(a) Birks

|      | $S$        | $kB$      | $C$        |
|------|------------|-----------|------------|
| $S$  | $2.80e-3$  | $2.59e-2$ | $-2.45e-2$ |
| $kB$ | $2.59e-2$  | 0.333     | -0.394     |
| $C$  | $-2.45e-2$ | -0.394    | 0.672      |

(b) Chou

|        | $S_e$     | $S_n$      | $kB_e$    | $kB_n$   |
|--------|-----------|------------|-----------|----------|
| $S_e$  | $2.13e-2$ | $7.01e-5$  | $1.47e-2$ | -2.93    |
| $S_n$  | $7.01e-5$ | $6.03e-4$  | $7.50e-4$ | -0.452   |
| $kB_e$ | $1.47e-2$ | $-7.50e-4$ | 0.276     | -159     |
| $kB_n$ | -2.93     | 0.452      | -159      | $1.45e5$ |

(c) Hong et al.

|        | $S_e$      | $S_n$      | $kB_e$    | $kB_n$ | $C$        |
|--------|------------|------------|-----------|--------|------------|
| $S_e$  | $2.84e-3$  | $2.66e-3$  | $2.61e-2$ | 1.44   | $-2.93e-2$ |
| $S_n$  | $2.66e-3$  | $5.87e-2$  | $2.41e-2$ | 0.434  | $-2.68e-2$ |
| $kB_e$ | $2.61e-2$  | $2.41e-2$  | 0.325     | 21.1   | -0.438     |
| $kB_n$ | 1.44       | 0.434      | 21.1      | 4779   | -46.6      |
| $C$    | $-2.93e-2$ | $-2.68e-2$ | -0.438    | -46.6  | 0.856      |

(d) Yoshida et al.

|       | $S$       | $T_0$     | $B_s$     | $R_d$     | $B_t$     |
|-------|-----------|-----------|-----------|-----------|-----------|
| $S$   | $1.88e-3$ | $9.38e-2$ | $2.19e-2$ | $1.10e-4$ | $1.05e-3$ |
| $T_0$ | $9.38e-2$ | 15.4      | 0.969     | $8.22e-4$ | $3.13e-2$ |
| $B_s$ | $2.19e-2$ | 0.969     | 0.617     | $1.07e-2$ | $3.65e-2$ |
| $R_d$ | $1.10e-4$ | $8.22e-4$ | $1.07e-2$ | $6.54e-4$ | $2.17e-3$ |
| $B_t$ | $1.05e-3$ | $3.13e-2$ | $3.65e-2$ | $2.17e-3$ | $8.96e-3$ |

(e) Voltz et al.

## 6 Proton and Carbon Light Yield Models

Table S10. Model parameters obtained through simultaneous fit of the EJ-204 proton and carbon light yield data.

| Model          | $S$ or $S_e$<br>(rel. 477 keV $e^-$ ) | $S_n$<br>(rel. 477 keV $e^-$ ) | $kB$ or $kB_e$<br>(mg/cm <sup>2</sup> /MeV) | $kB_n$<br>(mg/cm <sup>2</sup> /MeV) | $C$<br>(mg/cm <sup>2</sup> /MeV) <sup>2</sup> |
|----------------|---------------------------------------|--------------------------------|---------------------------------------------|-------------------------------------|-----------------------------------------------|
| Birks          | 2.51                                  | —                              | 13.2                                        | —                                   | —                                             |
| Chou           | 2.51                                  | —                              | 12.9                                        | —                                   | 0.416                                         |
| Hong et al.    | 2.51                                  | 2.05                           | 12.8                                        | 89.7                                | —                                             |
| Yoshida et al. | 2.51                                  | 2.51                           | 12.8                                        | 86.3                                | $2.69e-3$                                     |

(a) Birks, Chou, Hong et al. and Yoshida et al.

| $S$ (rel. 477 keV $e^-$ ) | $T_0$ (keV) | $B_s$ (mg/cm <sup>2</sup> /MeV) | $R_d$     | $B_t$ (mg/cm <sup>2</sup> /MeV) |
|---------------------------|-------------|---------------------------------|-----------|---------------------------------|
| 1.68                      | 11.0        | 4.32                            | $9.37e-2$ | 0.275                           |

(b) Voltz et al.

Table S11. Covariance matrices for model parameters obtained through simultaneous fit of the EJ-204 proton and carbon light yield data.

|      | $S$         | $kB$        |
|------|-------------|-------------|
| $S$  | $1.22e-20$  | $-1.27e-12$ |
| $kB$ | $-1.27e-12$ | $7.73e-2$   |

(a) Birks

|      | $S$        | $kB$       | $C$        |
|------|------------|------------|------------|
| $S$  | $1.52e-20$ | $2.68e-13$ | $2.04e-13$ |
| $kB$ | $2.68e-13$ | $0.112$    | $-2.66e-2$ |
| $C$  | $2.04e-13$ | $-2.66e-2$ | $1.09e-2$  |

(b) Chou

|        | $S_e$     | $S_n$      | $kB_e$     | $kB_n$    |
|--------|-----------|------------|------------|-----------|
| $S_e$  | $1.17e-7$ | $2.47e-6$  | $1.89e-7$  | $2.88e-4$ |
| $S_n$  | $2.47e-6$ | $0.154$    | $-4.61e-2$ | $5.73$    |
| $kB_e$ | $1.89e-7$ | $-4.61e-2$ | $0.100$    | $-4.51$   |
| $kB_n$ | $2.88e-4$ | $5.73$     | $-4.51$    | $433$     |

(c) Hong et al.

|        | $S_e$      | $S_n$      | $kB_e$     | $kB_n$     | $C$        |
|--------|------------|------------|------------|------------|------------|
| $S_e$  | $1.01e-5$  | $-3.02e-8$ | $3.52e-5$  | $3.09e-4$  | $-5.76e-6$ |
| $S_n$  | $-3.02e-8$ | $3.40e-4$  | $-2.67e-4$ | $2.31e-2$  | $-3.28e-5$ |
| $kB_e$ | $3.52e-5$  | $-2.67e-4$ | $0.100$    | $-4.37$    | $3.88e-5$  |
| $kB_n$ | $3.09e-4$  | $2.31e-2$  | $-4.37$    | $371$      | $-2.03e-2$ |
| $C$    | $-5.76e-6$ | $-3.28e-5$ | $3.88e-5$  | $-2.03e-2$ | $1.40e-4$  |

(d) Yoshida et al.

|       | $S$        | $T_0$      | $B_s$     | $R_d$      | $B_t$      |
|-------|------------|------------|-----------|------------|------------|
| $S$   | $4.37e-5$  | $-9.77e-4$ | $2.25e-6$ | $-6.19e-7$ | $-1.11e-6$ |
| $T_0$ | $-9.77e-4$ | $0.932$    | $7.55e-3$ | $4.70e-4$  | $1.69e-3$  |
| $B_s$ | $2.25e-6$  | $7.55e-3$  | $2.35e-2$ | $1.23e-3$  | $3.00e-3$  |
| $R_d$ | $-6.19e-7$ | $4.70e-4$  | $1.23e-3$ | $9.63e-5$  | $2.40e-4$  |
| $B_t$ | $-1.11e-6$ | $1.69e-3$  | $3.00e-3$ | $2.40e-4$  | $6.36e-4$  |

(e) Voltz et al.

Table S12. Model parameters obtained through simultaneous fit of the EJ-309 proton and carbon light yield data.

| Model          | $S$ or $S_e$<br>(rel. 477 keV e <sup>-</sup> ) | $S_n$<br>(rel. 477 keV e <sup>-</sup> ) | $kB$ or $kB_e$<br>(mg/cm <sup>2</sup> /MeV) | $kB_n$<br>(mg/cm <sup>2</sup> /MeV) | $C$<br>(mg/cm <sup>2</sup> /MeV) <sup>2</sup> |
|----------------|------------------------------------------------|-----------------------------------------|---------------------------------------------|-------------------------------------|-----------------------------------------------|
| Birks          | 2.51                                           | —                                       | 10.5                                        | —                                   | —                                             |
| Chou           | 2.22                                           | —                                       | 6.81                                        | —                                   | 5.05                                          |
| Hong et al.    | 2.42                                           | 2.51                                    | 7.61                                        | 2258                                | —                                             |
| Yoshida et al. | 2.17                                           | 2.51                                    | 6.46                                        | 10.7                                | 5.09                                          |

(a) Birks, Chou, Hong et al. and Yoshida et al.

| $S$ (rel. 477 keV e <sup>-</sup> ) | $T_0$ (keV) | $B_s$ (mg/cm <sup>2</sup> /MeV) | $R_d$ | $B_t$ (mg/cm <sup>2</sup> /MeV) |
|------------------------------------|-------------|---------------------------------|-------|---------------------------------|
| 1.70                               | 1.86        | 5.67                            | 0.192 | 0.468                           |

(b) Voltz et al.

Table S13. Covariance matrices for model parameters obtained through simultaneous fit of the EJ-309 proton and carbon light yield data.

|      | $S$       | $kB$      |
|------|-----------|-----------|
| $S$  | $2.56e-3$ | $1.32e-2$ |
| $kB$ | $1.32e-2$ | 0.304     |

(a) Birks

|      | $S$        | $kB$   | $C$        |
|------|------------|--------|------------|
| $S$  | $5.67e-2$  | 0.416  | $-7.98e-2$ |
| $kB$ | 0.416      | 3.23   | -0.847     |
| $C$  | $-7.98e-2$ | -0.847 | 0.951      |

(b) Chou

|        | $S_e$     | $S_n$     | $kB_e$    | $kB_n$ |
|--------|-----------|-----------|-----------|--------|
| $S_e$  | $2.10e-2$ | $1.99e-4$ | 0.165     | -17.9  |
| $S_n$  | $1.99e-4$ | $5.47e-4$ | $2.70e-3$ | -1.16  |
| $kB_e$ | 0.165     | $2.70e-3$ | 1.83      | -576   |
| $kB_n$ | -17.9     | -1.16     | -576      | 5.20e5 |

(c) Hong et al.

|        | $S_e$      | $S_n$      | $kB_e$     | $kB_n$   | $C$       |
|--------|------------|------------|------------|----------|-----------|
| $S_e$  | $6.06e-2$  | $-8.92e-4$ | 0.443      | 3.15     | -0.103    |
| $S_n$  | $-8.92e-4$ | $2.46e-3$  | $-7.72e-3$ | -2.97    | $1.50e-2$ |
| $kB_e$ | 0.443      | $-7.72e-3$ | 3.42       | 27.8     | -1.01     |
| $kB_n$ | 3.15       | -2.97      | 27.8       | $1.05e4$ | -50.4     |
| $C$    | -0.103     | $1.50e-2$  | -1.01      | -50.4    | 1.10      |

(d) Yoshida et al.

|       | $S$        | $T_0$      | $B_s$      | $R_d$      | $B_t$      |
|-------|------------|------------|------------|------------|------------|
| $S$   | $2.55e-3$  | $7.69e-2$  | $-1.99e-2$ | $-1.29e-3$ | $-1.47e-3$ |
| $T_0$ | $7.69e-2$  | 9.72       | -1.12      | $-5.96e-2$ | $-7.38e-2$ |
| $B_s$ | $-1.99e-2$ | -1.12      | 0.685      | $2.76e-2$  | $3.65e-2$  |
| $R_d$ | $-1.29e-3$ | $-5.96e-2$ | $2.76e-2$  | $1.48e-3$  | $1.92e-3$  |
| $B_t$ | $-1.47e-3$ | $-7.38e-2$ | $3.65e-2$  | $1.92e-3$  | $2.58e-3$  |

(e) Voltz et al.

Table S14. Model goodness-of-fit for proton and carbon light yield data with no parameter constraints. The values correspond to the median  $\chi^2$  statistic from the Monte Carlo distribution divided by the number of degrees of freedom. The uncertainty is given by the median absolute deviation.

| Scintillator | Birks                  | Chou                  | Hong et al.           | Yoshida et al.        | Voltz et al.         |
|--------------|------------------------|-----------------------|-----------------------|-----------------------|----------------------|
| EJ-204       | $(15627 \pm 1464)/43$  | $(15470 \pm 1409)/42$ | $(14136 \pm 1465)/41$ | $(13808 \pm 1443)/40$ | $(4632 \pm 1143)/40$ |
| EJ-309       | $(56658 \pm 10261)/54$ | $(18643 \pm 3376)/53$ | $(13409 \pm 3364)/52$ | $(10578 \pm 3164)/51$ | $(4798 \pm 661)/51$  |
